# Supplementary material
Source: publisher figshare collection journal article supplement (https://acs.figshare.com/ndownloader/files/27546706)
Supplement: Supplementary file 1 [file 27546706]

# Supplementary Material

## Green electrospun membranes based on chitosan/amino-functionalized nanoclay composite fibers for cationic dye removal: Synthesis and kinetic studies

Seyed Abolhassan Hosseini<sup>1,2</sup>, Shervin Daneshvar e Asl<sup>3</sup>, Manouchehr Vossoughi<sup>2</sup>, Abdolreza Simchi<sup>3</sup>, Mohtada Sadrzadeh<sup>1\*</sup>

<sup>1</sup>Department of Mechanical Engineering, 10-367 Donadeo Innovation Center for Engineering, Advanced Water Research Lab (AWRL), University of Alberta, Edmonton, AB, Canada, T6G 1H9

<sup>2</sup>Department of Chemical & Petroleum Engineering, Sharif University of Technology, Tehran, Iran

<sup>3</sup>Department of Materials Science & Engineering, Sharif University of Technology, Tehran, Iran

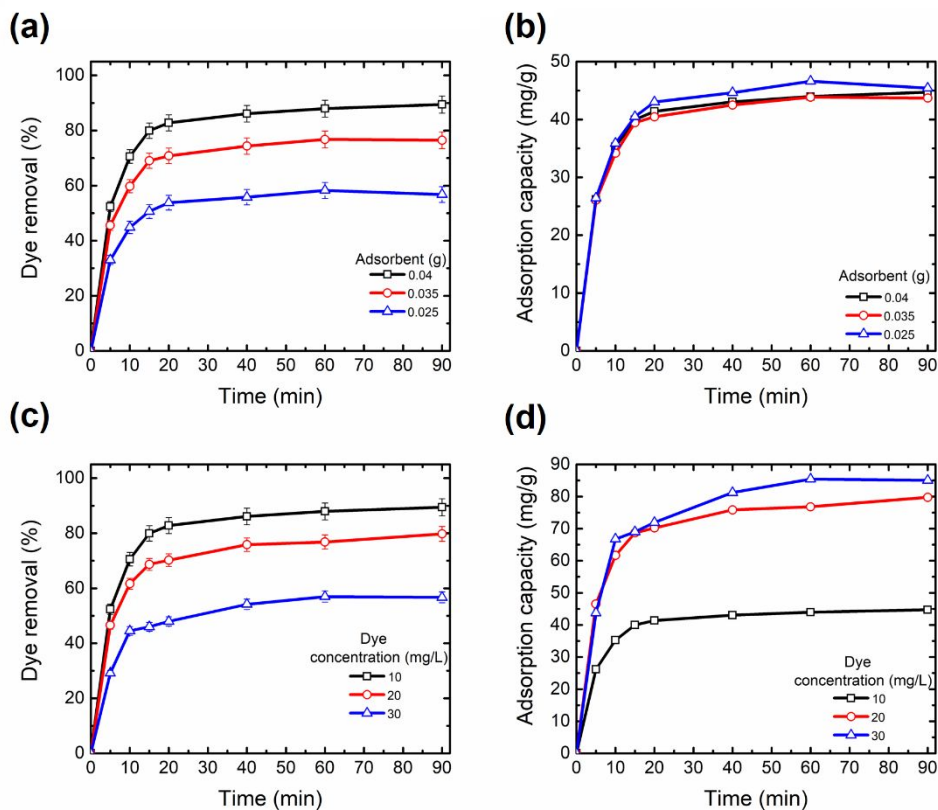

\* Corresponding Author, [sadrzade@ualberta.ca](mailto:sadrzade@ualberta.ca)

**Figure S1. Adsorption removal rate (left-hand side) and adsorption capacity (right-hand side) of the nanofibrous membranes. (a, b) effect of the adsorbent dosage (pH= 7 and dye concentration= 10 mg.L<sup>-1</sup>), (c, d) effect of initial dye concentration (pH=7 and adsorbent dosage= 0.04 g).**

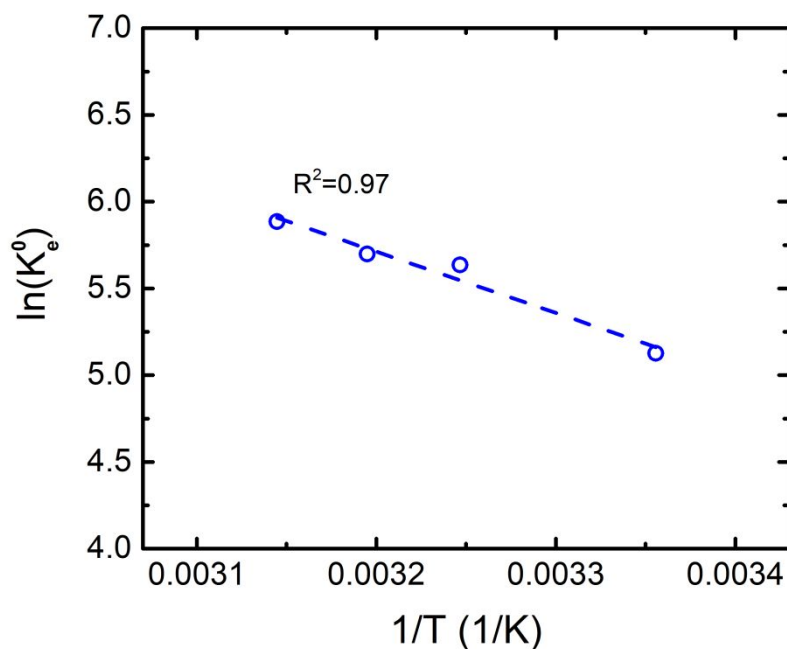

**Figure S2. Plots of  $\ln(K_e^0)$ -1/T for adsorption of BB41on ENM containing 2 wt.% OCT-MMT.**
